# Supplementary material for: Cellular signaling and gene expression profiles evoked by a bivalent macrocyclic peptide that serves as an artificial MET receptor agonist
Source: PubMed Central journal article supplement (PMC6220203; doi:10.1038/s41598-018-34835-4), 2018-11-07
Supplement: 41598_2018_34835_MOESM1_ESM.pdf [file 41598_2018_34835_MOESM1_ESM.pdf]

**Cellular signaling and gene expression profiles evoked by a bivalent macrocyclic peptide that serves as an artificial MET receptor agonist**

Wenyu Miao, Katsuya Sakai, Naoya Ozawa, Takumi Nishiuchi, Yoshinori Suzuki, Kenichiro Ito, Tomomi Morioka, Masataka Umitsu, Junichi Takagi, Hiroaki Suga and Kunio Matsumoto

Supplementary Figure 1

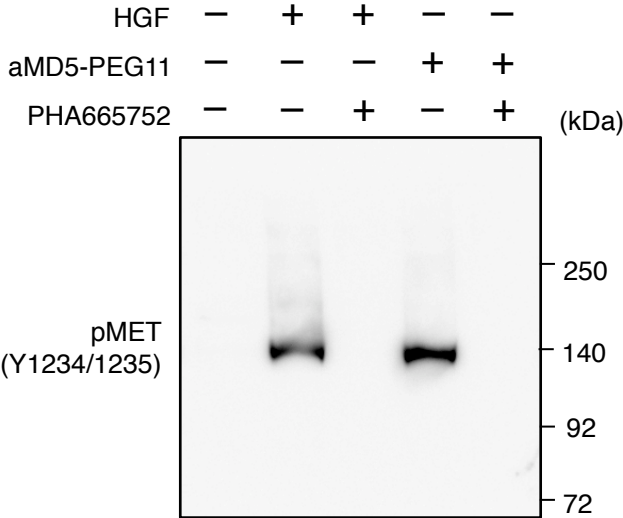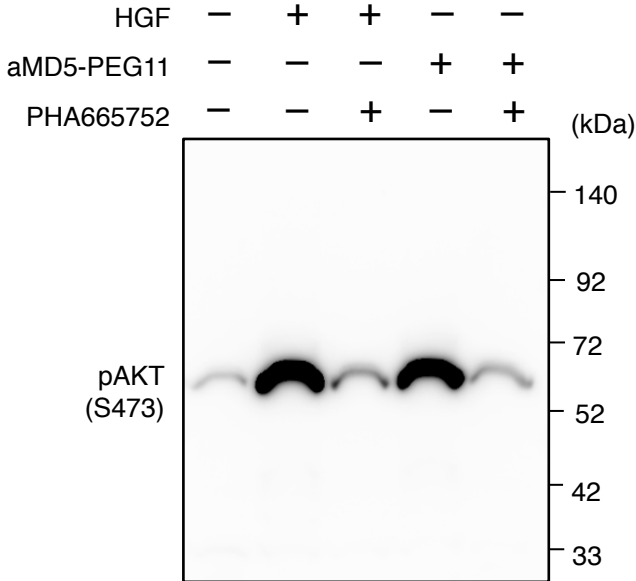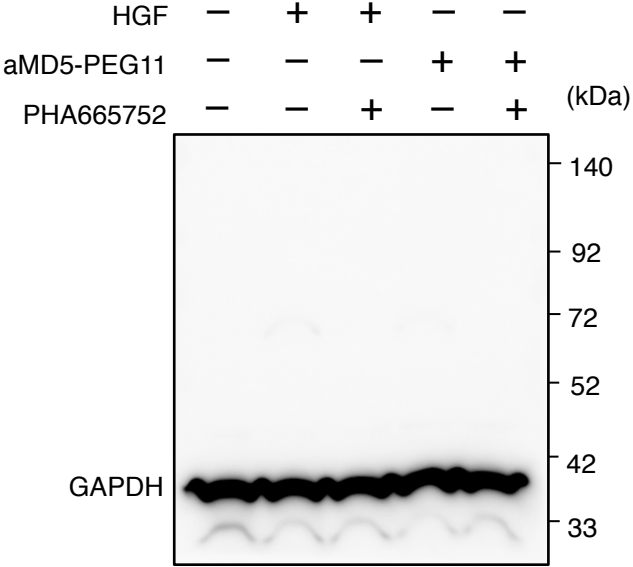

Supplementary Fig.1. Original blot images for Fig. 3A.

Supplementary Figure 2

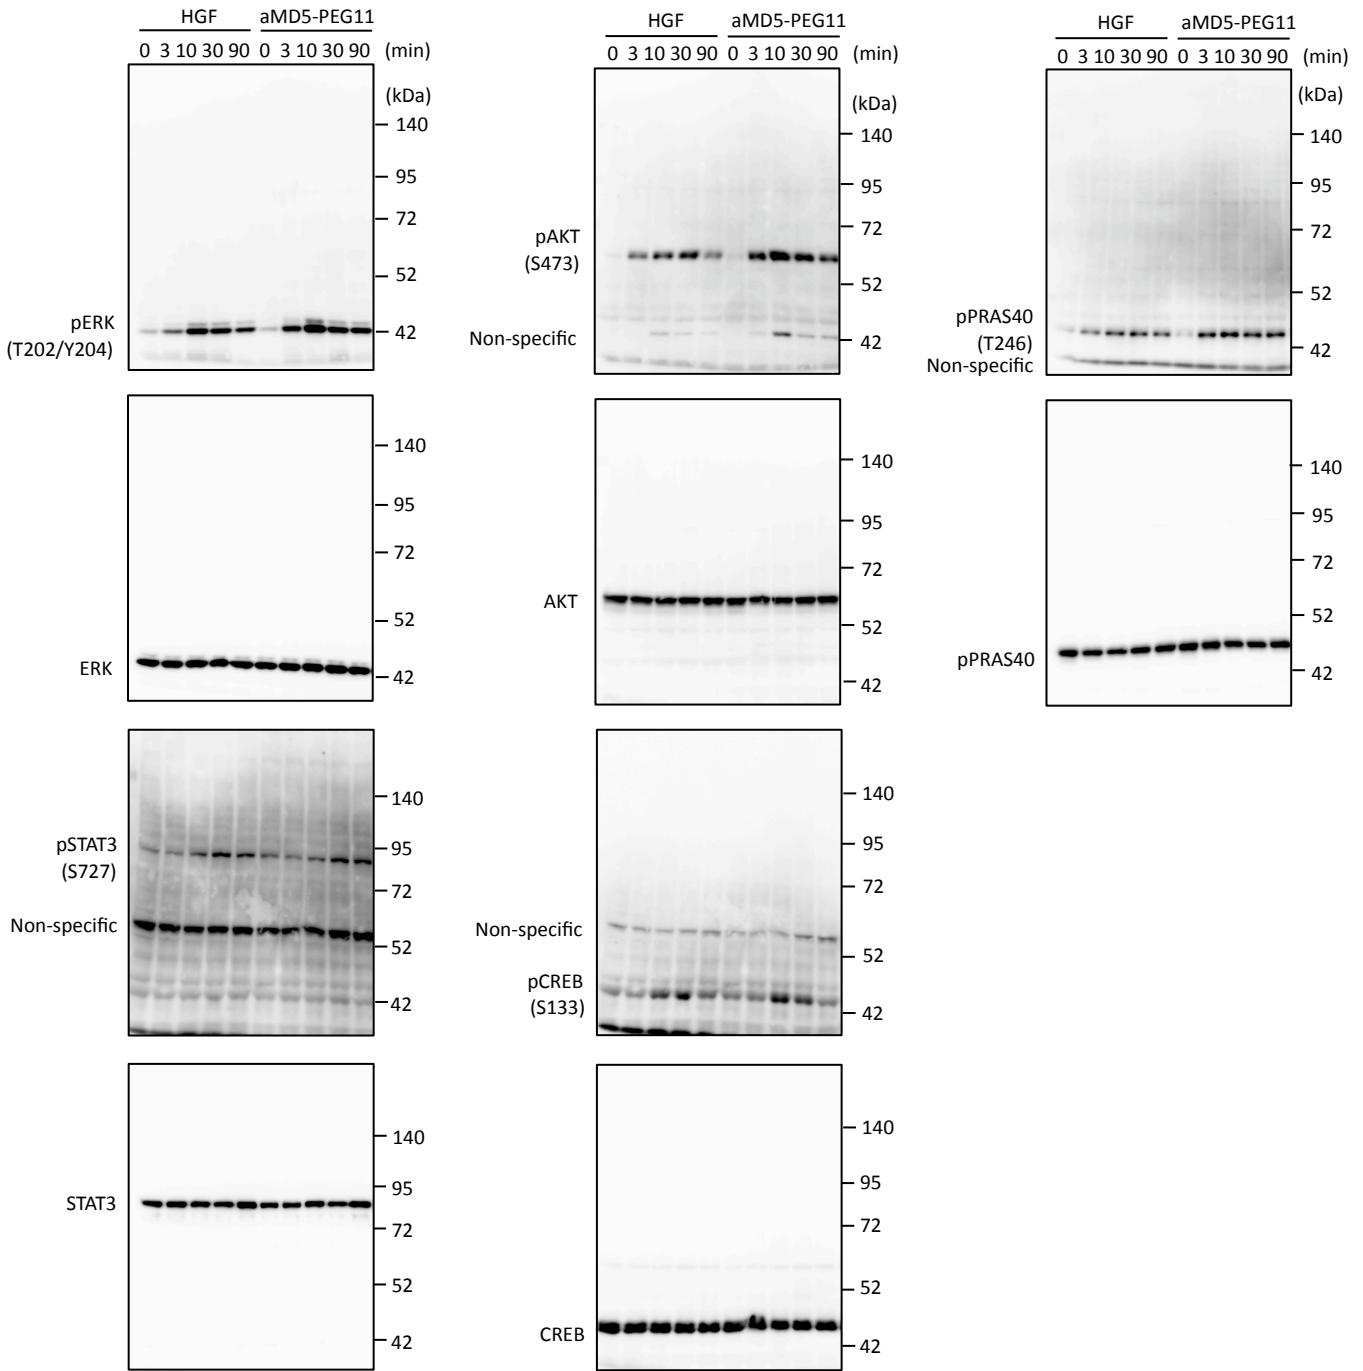

Supplementary Fig.2. Original blot images for Fig. 3B.
